# Supplementary material for: Natural History of Stargardt Disease: The Longest Follow-Up Cohort Study
Source: MDPI journal article supplement (doi:10.3390/genes14071394), 2023-07-02
Supplement: s1 [file s1]

**Table S1.** Clinical characteristics

| P   | Sex | ABCA4 variant 1                                              | ABCA4 variant 2                                                            | Age at onset [years] | Follow-up period [years] | Duration between onset and the first exam [years] | Age at the first and last exams [years] | VA at the first and last exams [Snellen] | VA loss per year [Snellen] | DDAF area at the first and last exams [mm <sup>2</sup> ] | Increase of DDAF area per year [mm <sup>2</sup> ] | ERG group at the first and last exams | Fishman stage at the first and last exams |
|-----|-----|--------------------------------------------------------------|----------------------------------------------------------------------------|----------------------|--------------------------|---------------------------------------------------|-----------------------------------------|------------------------------------------|----------------------------|----------------------------------------------------------|---------------------------------------------------|---------------------------------------|-------------------------------------------|
| 1*  | F   | c.4234C>T; p.(Gln1412*)                                      | c.5882G>A; p.(Gly1961Glu)                                                  | 46                   | 26                       | 0                                                 | 46<br>72                                | 0.8<br>0.16                              | 0.025                      | 0.47<br>8.18                                             | 0.296                                             | normal ERG<br>1                       | II<br>III                                 |
| 2   | F   | c.2041C>T;<br>p.(Arg681*)                                    | c.5413A>G; p.(Asn1805Asp)                                                  | 15                   | 25                       | 14                                                | 29<br>54                                | 0.1<br>0.05                              | 0.002                      | 13.70<br>78.61                                           | 2.596                                             | 3<br>3                                | III<br>IV                                 |
| 3*  | M   | c.5882G>A;<br>p.(Gly1961Glu)                                 | c.[5461-10T>C;5603A>T];<br>p.[Thr1821Aspfs*6,Thr1821Valfs*13;(Asn1868Ile)] | 7                    | 13                       | 15                                                | 22<br>35                                | 0.2<br>0.15                              | 0.004                      | 0.02<br>1.85                                             | 0.141                                             | 1<br>3                                | I<br>I                                    |
| 4*  | F   | c.1648G>A;<br>p.(Gly550Arg)                                  | c.5882G>A; p.(Gly1961Glu)                                                  | 14                   | 21                       | 30                                                | 44<br>65                                | 0.2<br>0.02                              | 0.009                      | 0.20<br>0.43                                             | 0.011                                             | normal ERG<br>normal ERG              | I<br>I                                    |
| 5   | F   | c.2041C>T; p.(Arg681*)                                       | c.6089G>A; p.(Arg2030Gln)                                                  | 15                   | 23                       | 4                                                 | 19<br>42                                | 0.15<br>0.03                             | 0.005                      | 1.43<br>17.69                                            | 0.707                                             | 1<br>2                                | I<br>III                                  |
| 6   | F   | c.5175dup(; )5603A>T;<br>p.(Thr1726Aspfs*61)(; )(Asn1868Ile) | c.5714+5G>A;<br>p.[=,Glu1863Leufs*33]                                      | 18                   | 11                       | 9                                                 | 27<br>38                                | 0.4<br>0.03                              | 0.034                      | 11.60<br>21.82                                           | 0.929                                             | 2<br>2                                | III<br>III                                |
| 7   | F   | c.5175dup(; )5603A>T;<br>p.(Thr1726Aspfs*61)(; )(Asn1868Ile) | c.5714+5G>A;<br>p.[=,Glu1863Leufs*33]                                      | 25                   | 11                       | 6                                                 | 31<br>42                                | 0.8<br>0.02                              | 0.071                      | 11.18<br>59.14                                           | 4.361                                             | 2<br>3                                | III<br>III                                |
| 8   | M   | c.688T>A; p.(Cys230Ser)                                      | c.4539+2T>C;<br>p.(?)                                                      | 11                   | 19                       | 2                                                 | 13<br>32                                | 0.3<br>0.03                              | 0.015                      | 0.24<br>9.81                                             | 0.504                                             | 2<br>2                                | I<br>III                                  |
| 9*  | M   | c.2041C>T; p.(Arg681*)                                       | c.5603A>T; p.(Asn1868Ile)                                                  | 30                   | 17                       | 0                                                 | 30<br>47                                | 0.8<br>0.2                               | 0.035                      | 0.12<br>0.96                                             | 0.050                                             | normal ERG<br>1                       | I<br>II                                   |
| 10* | F   | c.1918C>G(; )5603A>T;<br>p.(Pro640Ala)(; )(Asn1868Ile)       | c.5882G>A; p.(Gly1961Glu)                                                  | 38                   | 20                       | 1                                                 | 39<br>59                                | 0.8<br>0.2                               | 0.030                      | 0.30<br>0.71                                             | 0.021                                             | 1<br>1                                | I<br>I                                    |
| 11* | F   | c.5175dup(; )5603A>T;<br>p.(Thr1726Aspfs*61)(; )(Asn1868Ile) | c.5882G>A; p.(Gly1961Glu)                                                  | 19                   | 20                       | 6                                                 | 25<br>45                                | 0.2<br>0.3                               | -0.005                     | 0.00<br>0.03                                             | 0.002                                             | normal ERG<br>normal ERG              | I<br>I                                    |

|     |   |                                                                            |                                                     |    |    |   |    |      |       |       |        |            |     |
|-----|---|----------------------------------------------------------------------------|-----------------------------------------------------|----|----|---|----|------|-------|-------|--------|------------|-----|
| 12* | F | c.4919G>A;<br>p.(Arg1640Gln)                                               | c.5603A>T; p.(Asn1868Ile)                           | 20 | 26 | 1 | 21 | 0.6  | 0.022 | 2.43  | 0.269  | 1          | I   |
|     |   |                                                                            |                                                     |    |    |   | 47 | 0.03 |       | 9.43  |        | 2          | III |
| 13* | F | c.2041C>T; p.(Arg681*)                                                     | c.5603A>T; p.(Asn1868Ile)                           | 20 | 16 | 0 | 20 | 0.2  | 0.003 | 0.90  | 0.083  | 1          | I   |
|     |   |                                                                            |                                                     |    |    |   | 36 | 0.16 |       | 2.23  |        | 1          | I   |
| 14  | F | c.6445C>T; p.(Arg2149*)                                                    | c.6445C>T; p.(Arg2149*)                             | 7  | 10 | 0 | 7  | 0.1  | 0.008 | 0.03  | 1.152  | 3          | II  |
|     |   |                                                                            |                                                     |    |    |   | 17 | 0.02 |       | 11.54 |        | 3          | II  |
| 15  | F | c.6445C>T; p.(Arg2149*)                                                    | c.6445C>T; p.(Arg2149*)                             | 9  | 12 | 1 | 10 | 0.3  | 0.024 | 0.91  | 1.574  | 2          | II  |
|     |   |                                                                            |                                                     |    |    |   | 22 | 0.02 |       | 19.80 |        | 3          | III |
| 16  | M | c.5977del; p.(Ser1993fs)                                                   | c.5461-10T>C;<br>p.[Thr1821Aspfs*6,Thr1821Valfs*13] | 8  | 11 | 1 | 9  | 0.1  | 0.005 | 3.81  | 1.129  | 3          | II  |
|     |   |                                                                            |                                                     |    |    |   | 20 | 0.04 |       | 16.23 |        | 3          | III |
| 17  | M | c.[5461-10T>C;5603A>T];<br>p.[Thr1821Aspfs*6,Thr1821Valfs*13;(Asn1868Ile)] | c.5714+5G>A;<br>p.[=,Glu1863Leufs*33]               | 11 | 18 | 5 | 16 | 0.2  | 0.007 | 0.16  | 0.1628 | 1          | II  |
|     |   |                                                                            |                                                     |    |    |   | 34 | 0.03 |       | 3.09  |        | 3          | III |
| 18  | F | c.1570A>G;<br>p.(Lys524Glu)                                                | c.5714+5G>A;<br>p.[=,Glu1863Leufs*33]               | 17 | 11 | 1 | 18 | 0.3  | 0.009 | 0.15  | 0.4109 | normal ERG | II  |
|     |   |                                                                            |                                                     |    |    |   | 29 | 0.2  |       | 4.67  |        | normal ERG | III |

Patients 6 and 7, as well as 14 and 15 are siblings. Eight patients with p.(Gly1961Glu) or p.(Asn1868Ile) allele are marked with a star. Abbreviation explanation: F—female, M—male.
