# Supplementary material for: Natural History of Stargardt Disease: The Longest Follow-Up Cohort Study
Source: MDPI journal article supplement (doi:10.3390/genes14071394), 2023-07-02
Supplement: s1 [file s1]

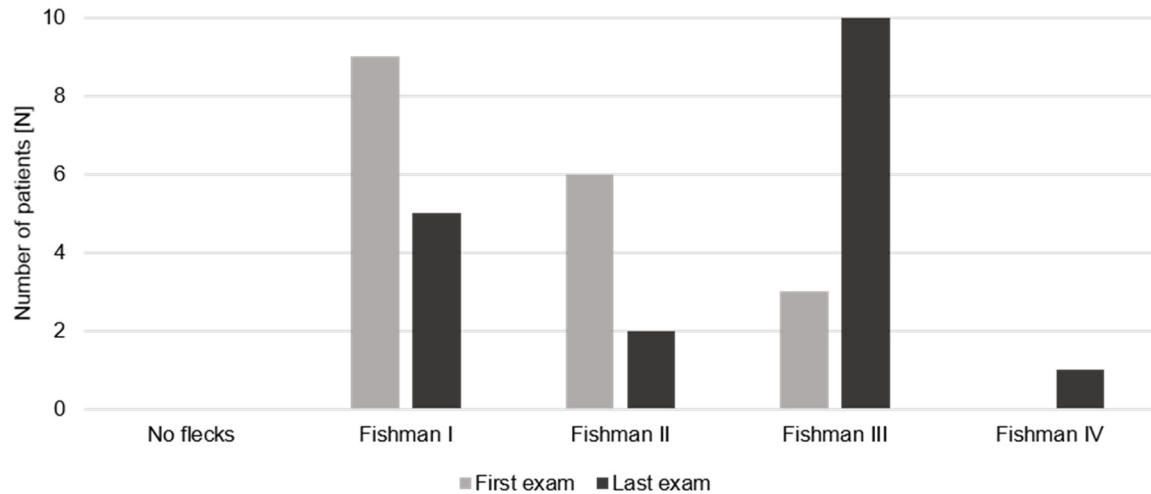

**Figure S2.** Representation of Fishman stages for the first and last exams. According to the Fishman classification, at the beginning of the follow-up, 9 patients were classified as stage I, 6 patients as stage II and 3 patients as stage III. None of the patients had a normal fundus appearance. Moreover, none of them was in Fishman stage IV. At the end of the follow-up, 5 patients were classified as Fishman stage I, 2 as stage II, 10 as stage III, whereas 1 patient was in Fishman stage IV. Fundus appearance stayed stable in 8/18 (44%) patients, while it progressed in 10/18 (56%) patients. In 7 patients, it progressed for one Fishman stage and in 3 patients for two Fishman stages.
